# Supplementary material for: Human Bone Marrow Stromal Cells Lose Immunosuppressive and Anti-inflammatory Properties upon Oncogenic Transformation
Source: PubMed Central journal article supplement — Stem Cell Reports. 2014 Sep 11;3(4):606–19. doi: 10.1016/j.stemcr.2014.08.005 (PMC4223704; doi:10.1016/j.stemcr.2014.08.005), 2014-09-11
Supplement: mmc1.pdf [file mmc1.pdf]

**Stem Cell Reports, Volume 3**

**Supplemental Information**

**Human Bone Marrow Stromal Cells Lose  
Immunosuppressive and Anti-inflammatory Properties upon  
Oncogenic Transformation**

**Rene Rodriguez, Michael Rosu-Myles, Marcos Aráuzo-Bravo, Angélica Horrillo, Qiuwei Pan, Elena Gonzalez-Rey, Mario Delgado, and Pablo Menendez**

# 1.-SUPPLEMENTAL FIGURES

## Supplemental Figure 1

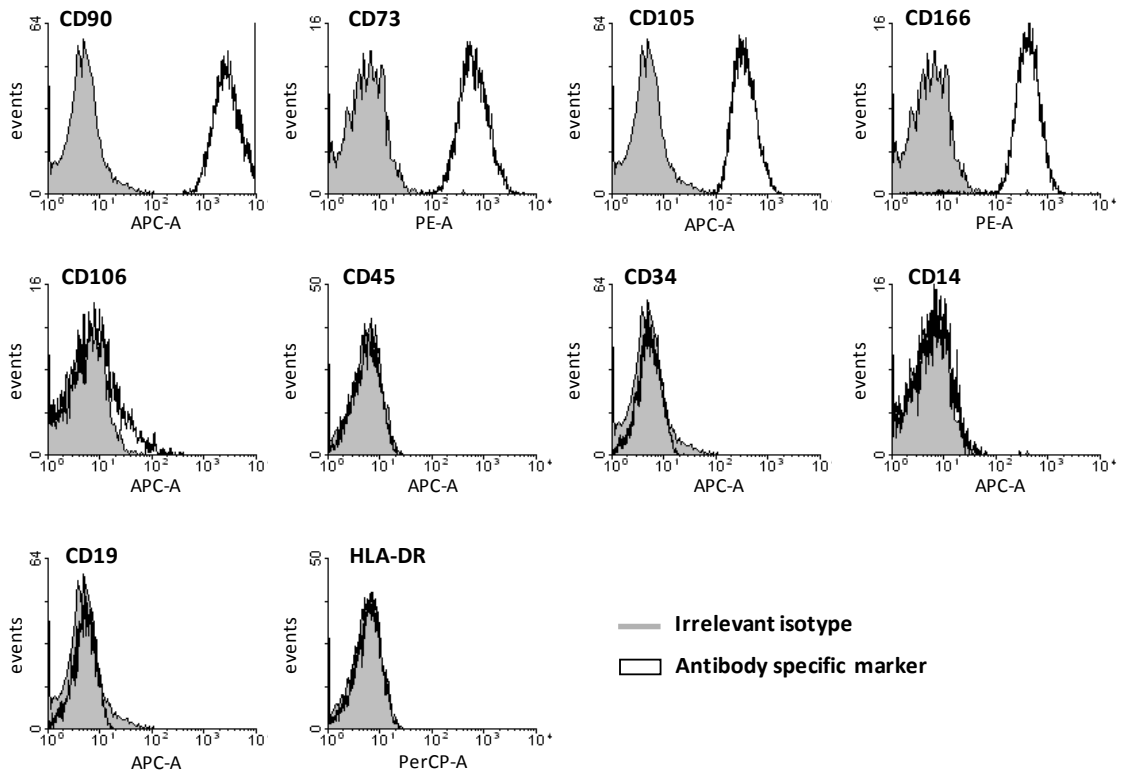

Supplemental Figure 2

A

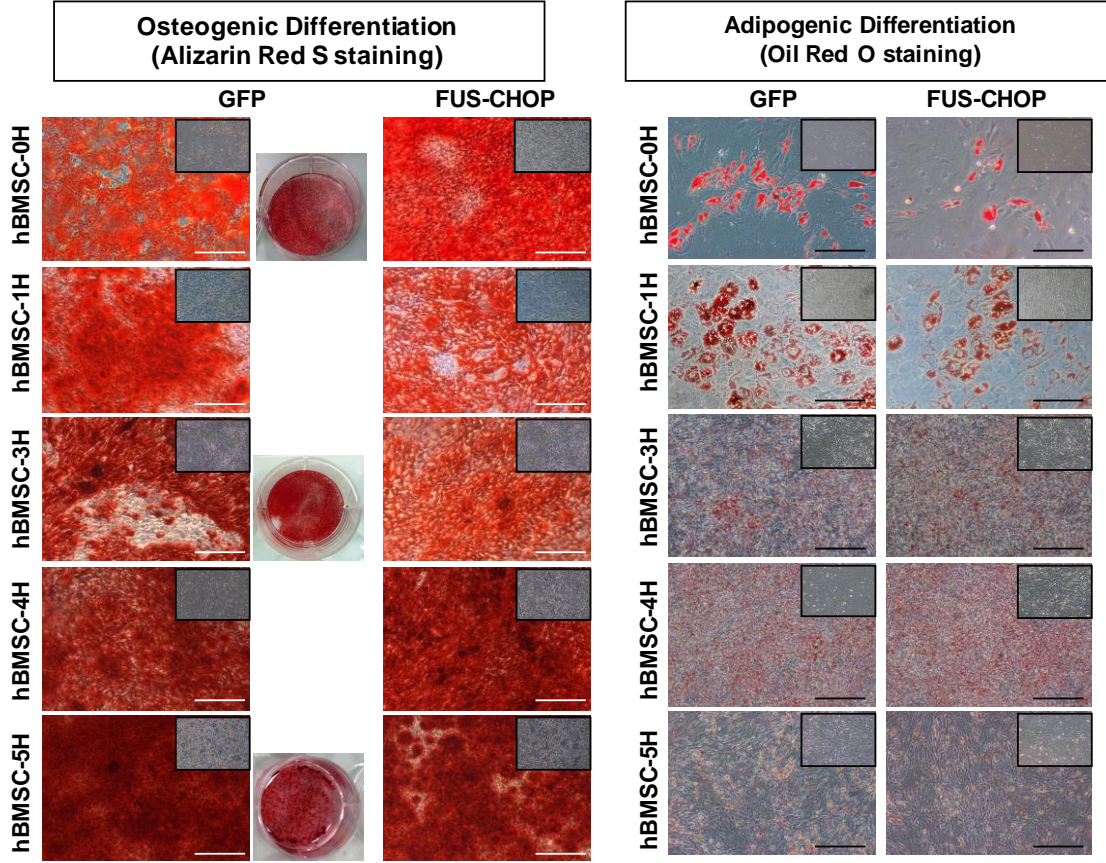

B

|             | adipogenic differentiation |                                                                                             | Osteogenic differentiation |                                              |
|-------------|----------------------------|---------------------------------------------------------------------------------------------|----------------------------|----------------------------------------------|
|             | level of diff.             | description                                                                                 | level of diff.             | description                                  |
| BMSC-0H-GFP | ++                         | Abundant presence of adipocytes presenting fat droplets-filled cytoplasm                    | +                          | High level of extracellular calcium deposits |
| BMSC-0H-FC  | +                          | Abundant presence of adipocytes presenting fat droplets-filled cytoplasm                    | +                          | High level of extracellular calcium deposits |
| BMSC-1H-GFP | +++                        | Abundant presence of adipocytes presenting fat droplets-filled cytoplasm                    | +                          | High level of extracellular calcium deposits |
| BMSC-1H-FC  | ++                         | Abundant presence of adipocytes presenting fat droplets-filled cytoplasm                    | +                          | High level of extracellular calcium deposits |
| BMSC-3H-GFP | +/-                        | Majority of partially differentiated cells presenting few fat droplets in the cytoplasm     | +                          | High level of extracellular calcium deposits |
| BMSC-3H-FC  | +/-                        | Majority of partially differentiated cells presenting few fat droplets in the cytoplasm     | +                          | High level of extracellular calcium deposits |
| BMSC-4H-GFP | +/-                        | Majority of partially differentiated cells presenting few fat droplets in the cytoplasm     | +                          | High level of extracellular calcium deposits |
| BMSC-4H-FC  | +/-                        | Majority of partially differentiated cells presenting few fat droplets in the cytoplasm     | +                          | High level of extracellular calcium deposits |
| BMSC-5H-GFP | -                          | low presence of partially differentiated cells presenting few fat droplets in the cytoplasm | +                          | High level of extracellular calcium deposits |
| BMSC-5H-FC  | -                          | low presence of partially differentiated cells presenting few fat droplets in the cytoplasm | +                          | High level of extracellular calcium deposits |

## 2.-SUPPLEMENTAL LEGENDS

**Figure S1**, related to Figure 1. Representative flow cytometric analysis of the surface markers indicated.

**Figure S2**, related to Figure 1. Sequential acquisition of oncogenic hits in hBMSCs impairs their adipogenic differentiation ability. **(A)** Representative images of the osteogenic (alizarin red staining; stained entire 6-well plates are shown to show that oncogenic hits do not impair osteogenic differentiation) and adipogenic (oil red staining) differentiation capacity of the indicated hBMSC cultures. Inset images represent negative controls of differentiation. Scale bars=100  $\mu$ m. **(B)** Summary table of the osteogenic and adipogenic potential of the hMSC assayed. The adipogenic differentiation was estimated according to the level of Oil Red staining as follows: +++ (>50% of cells show complete differentiation), ++ (35%-50% of cells show complete differentiation), + (20%-35% of cells show complete differentiation), +/- (majority of the cells show partial differentiation) and - (<5% of the cells are partially differentiated). All the hMSC types assayed for osteogenic displayed a strong level of Alizarin Red S staining (+).

## 3.-SUPPLEMENTAL TABLE

**Table S1.** Summary of the immunophenotypic profile of the different hBMSCs used in this study, related to Figure 1.

| hBMSC line   | CD90 | CD73 | CD105 | CD166 | CD44 | CD106 | CD45 | CD34 | CD14 | CD19 | HLA-DR |
|--------------|------|------|-------|-------|------|-------|------|------|------|------|--------|
| hBMSC-0H-GFP | +    | +    | +     | +     | +    | -     | -    | -    | -    | -    | -      |
| hBMSC-0H-FC  | +    | +    | +     | +     | +    | -     | -    | -    | -    | -    | -      |
| hBMSC-1H-GFP | +    | +    | +     | +     | +    | -     | -    | -    | -    | -    | -      |
| hBMSC-1H-FC  | +    | +    | +     | +     | +    | -     | -    | -    | -    | -    | -      |
| hBMSC-3H-GFP | +    | +    | +     | +     | +    | -     | -    | -    | -    | -    | -      |
| hBMSC-3H-FC  | +    | +    | +     | +     | +    | -     | -    | -    | -    | -    | -      |
| hBMSC-4H-GFP | +    | +    | +     | +     | +    | -     | -    | -    | -    | -    | -      |
| hBMSC-4H-FC  | +    | +    | +     | +     | +    | -     | -    | -    | -    | -    | -      |
| hBMSC-5H-GFP | +    | +    | +     | +     | +    | -     | -    | -    | -    | -    | -      |
| hBMSC-5H-FC  | +    | +    | +     | +     | +    | -     | -    | -    | -    | -    | -      |
